# Supplementary material for: B-Lymphocytes from a Population of Children with Autism Spectrum Disorder and Their Unaffected Siblings Exhibit Hypersensitivity to Thimerosal
Source: J Toxicol. 2013 Jun 9;2013:801517. doi: 10.1155/2013/801517 (PMC3697751; doi:10.1155/2013/801517)
Supplement: Supplementary file 1 — Figure 2A Supp shows the color-coded ASD-ranked LDH-G50 in each of the eleven AGRE family groups, A-K, and Coriell external controls. The boxes represent three different means; +/- SD. In families A-D, the 12 individual cells lines have an average LDH-G50 of 452 nM, with a SD of 167. The 21 cell lines of families E-K have an average LDH-G50 of 985 nM, with a SD of 259. The eleven Coriell external controls cells have an average LDH-G50 of 1017 nM, with a SD of 308. Families A-D are significantly different from controls while the other families are not; with p values of one-tailed t-test's being 0.0000068 and 0.1697 respectively. Figure 2B Supp shows the same data plotted with respect to cell type divided into cells believed to be thimerosal sensitive (red) and normal (black). The p values on the plot indicate the results from a one-tailed t-test with respect to the whole (i.e. n=11), Coriell population. The datasets strongly suggest that at least 8 cell lines, 4 ASD, 2 Twins and 2 Siblings, are members of a discrete population in which the LDH-G50 is 348 nM with a SD of 52. Figure 4 Supp shows the effect of thimerosal on the ratio of LDH-G50/XTT-G50, derived from the data shown in Figure 2 and Figure 3. In Figure 4A Supp we have ranked using our color-coded cell labeling system and have again underlined cell lines we believe highly sensitive to thimerosal. In the upper insert, Figure 4B Supp, we show the distribution of the four cells types in the four quartiles of the ranked distribution. ASD derived cells are more clustered in the right-hand side of the distribution and the external controls are distributed quite evenly. In the second insert, Figure 4C Supp, we show the average and standard deviation of the difference between the control and familial cell ratios. The ASD cells are not statistically different from the controls, or both sets of siblings. However, the sensitive cells that we have identified are characterized by having a large LDH-G50/XTT-G50 ratio and [file 801517.f1.xls]

## Sheet: Supp2A data
ID	Rank	Aut	Twin	Sib	Con	C-Aut	c-Twim	C-Sib
F8	A	313.636	313.636	647.727	647.727	313.182	313.182	16.5909
F9	B	314	648	373	1000	313.636	81.8182	-136.364
F7	C	334.091	565.909	784.091	715.909	327.273	460.227	327.273
F4	D	422.727	289.773	422.727	784.091	-163.636	-92.0455	-347.727
F5	E	593.182	1073.86	1125	1090.91	102.273	-334.091	248.864
F11	F	675	780.682	1465.91	1176.14	686	352	627
F6	G	706.053	952.949	642.894	805.034	497.727	17.0455	-34.0909
F1	H	750	681.818	1261.36	1363.64	501.136	395.455	-189.773
F2	I	988.636	917.045	1172.73	825	-95.6364	279.364	153.227
F3	J	1172.73	1414.77	1056.82	1448.86	46.1364	-95.9091	162.045
F10	K	1295.45	920.455	1046.59	1431.82	513.636	581.818	2.27273
565.909
593.182
642.894
647.727
648
675
681.818
706.053
750
780.682
784.091
805.034
825
917.045
920.455
952.949
988.636
1046.59
1056.82
1073.86
1090.91
1125
1172.73
1172.73
1176.14
1261.36
1295.45
1363.64
1414.77
1431.82
1448.86
1465.91

## Sheet: Supp2B data
daD	MeanA	MeanB	A	B	A	B	A	B	A	B	A	B	A	B	A
Aut	346.114	883.008
Aut			313.636	314	334.091	422.727
Aut							593.182	675	706.053	750	988.636	1172.73	1295.45
Aut
Twin	301.705	883.944
Twin			289.773	313.636
Twin							565.909	648	1073.86	780.682	952.949	681.818	917.045	1414.77	920.455
Twin
Sib	397.864	1018.4
Sib			373	422.727
Sib							610.227	784.091	1125	1465.91	642.894	1261.36	1172.73	1056.82	1046.59
Sib
Cont	760.511	1163.06
Cont			647.727	1000	715.909	784.091
Cont							1090.91	1176.14	805.034	1363.64	825	1448.86	1431.82
Cont
SD1	SD2
51.9623	271.256
16.8741	258.208
35.1625	287.066
176.273	271.413
