# Supplementary material for: B-Lymphocytes from a Population of Children with Autism Spectrum Disorder and Their Unaffected Siblings Exhibit Hypersensitivity to Thimerosal
Source: J Toxicol. 2013 Jun 9;2013:801517. doi: 10.1155/2013/801517 (PMC3697751; doi:10.1155/2013/801517)
Supplement: Supplementary file 2 [file 801517.f2.xls]

## Sheet: Fig4S AandB Data
ID	Rank	Aut (LDH/XTT)	Twin (LDH/XTT)	Sib (LDH/XTT)	Corel (LDH/XTT)			Quartile	ASD	Twin	Sib	Cont
F1	23		1.25626					1st	2	4	3	2
F1	28	1.34837						2nd	2	2	4	3
F1	32			1.50743				3rd	2	3	2	4
F1	44				2.40765			4th	5	2	2	2
F10	19			1.1673
F10	21		1.2104
F10	24				1.26506
F10	29	1.37019
F11	1			0.484955
F11	3		0.764916
F11	4				0.797857
F11	10	0.956293
F2	6			0.810078
F2	30		1.4176
F2	36				1.63636
F2	38	1.82069
F3	5		0.804183
F3	11	0.970162
F3	17			1.07657
F3	20				1.17333
F4	31				1.46893
F4	34			1.53008
F4	43		2.3496
F4D	42	2.22802
F5	8			0.90958
F5	14		1.02191
F5	15	1.03312
F5	22				1.25416
F6	7		0.87
F6	9				0.9375
F6	12			1
F6	37	1.70455
F7	25			1.26932
F7	27				1.2909
F7	33		1.5175
F7C	41	1.95764
F8	2		0.697316
F8	26				1.27314
F8	35			1.62165
F8A	40	1.90398
F9	13				1
F9	18			1.12601
F9	39		1.85185
F9B	16	1.0665
		1.48723	1.25105	1.13663	1.31863
		0.45471	0.510739	0.339315	0.431101

## Sheet: Fig 4S data
	Mean Low	SD	Mean High	SD	Cell	Totmean	TotSD																							0.203171	-0.880676
Aut	-0.53079	0.314208	0.0438846	0.555368	Aut	-0.165088	0.546573																							-0.0664968	-0.126005
Twin	-0.152428	1.0299	0.0157452	0.61946	Twin	-0.0148318	0.646283																							-0.851852	-0.0611567
Sib	-0.093581	0.0458549	0.218369	0.423039	Sib	0.161651	0.399128																							-0.226596
Cont					Cont	2.01859e-17	0.441673																							0.232251
